# Supplementary material
Source: MDPI journal article supplement (https://www.mdpi.com/2674-0583/2/1/3)
Supplement: s1 [file s1]

## Supplementary Information

### Generation of new glycoanalogues of polyene antibiotics by synthetic biology - testing current technical boundaries

Mark Hogan, Yuhao Song, Jimmy Muldoon and Patrick Caffrey\*

School of Biomolecular and Biomedical Science, School of Chemistry and Centre for Synthesis and Chemical Biology, University College Dublin, Belfield, Dublin 4, Ireland.

\*Correspondence: patrick.caffrey@ucd.ie

#### pLAGO-pegA1

```
ermEp2 promoter
GCGGTCGATCTTGACGGCTGGCGAGAGGTGCGGGAGGATCTGACCGACGCGGTCCACACGT

Hybrid BamHI-BglII site
GGCACCGCATGCTGTTGTGGGCACAATCGTGCCGGTTGGTAGGATCTGCTAAGGAAATTCTG

M R V S L Q G T G K R P S
GCACCGATCGGTCGCAGGATCGGTGCGGGTGTCCTTGCAGGGCACCGCAAACGCCGAGCG

V G D E M T S H R P I L F C C
TAGGAGACGAGATGACATCGCATCGTCCCATCCTGTTCTGTTGCAC
```

#### pLAGO-pegA2

```
ermEp2 promoter
GCGGTCGATCTTGACGGCTGGCGAGAGGTGCGGGAGGATCTGACCGACGCGGTCCACACGT

Hybrid BamHI-BglII site
GGCACCGCATGCTGTTGTGGGCACAATCGTGCCGGTTGGTAGGATCTTGCAGGGCACCGGC

M T S H R P I L F C C
AAACGCCCGAGCGTAGGAGACGAGATGACATCGCATCGTCCCATCCTGTTCTGTTGCAC
```

Fig. S1 Difference between pLAGO-pegA1 and pLAGO-pegA2. pLAGO-pegA1 has 36 nucleotides upstream from the first possible start codon. pLAGO-pegA2 has 38 nucleotides upstream from the second methionine codon.

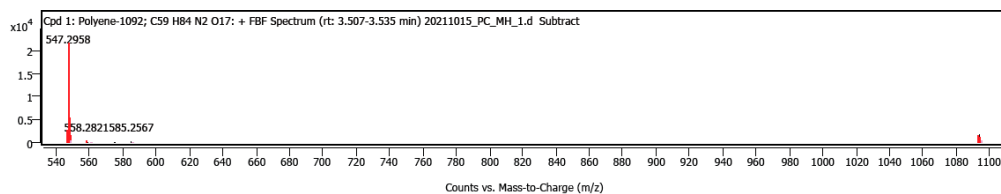

Fig. S2 Detection of candicidin A1,  $M = 1092.5770$ ,  $(M + 2H)^{2+}/2 = 547.2958$

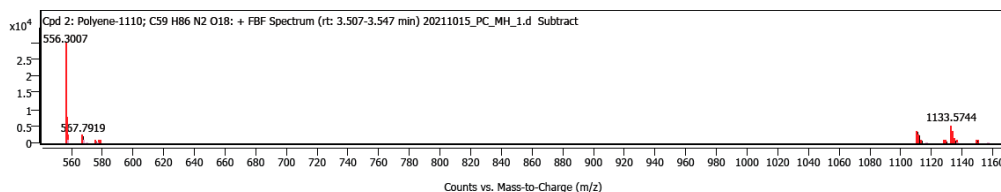

Fig. S3 Detection of candicidin A3,  $M = 1110.5876$ ,  $(M + 2H)^{2+}/2 = 556.3007$ ;  $(M + Na)^+ = 1133.5744$

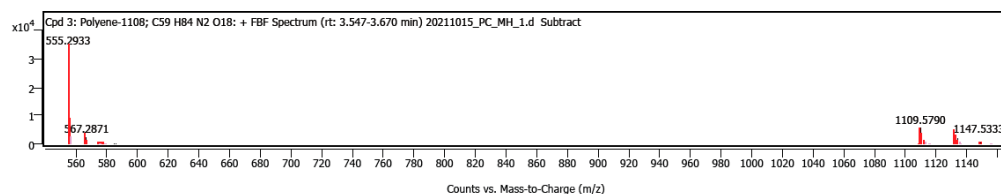

Fig. S4 Detection of candicidin D,  $M = 1108.5719$ ,  $(M + 2H)^{2+}/2 = 555.2933$ ;  $(M + H)^+ = 1109.5790$ ;  $(M + K)^+ = 1147.5333$ .

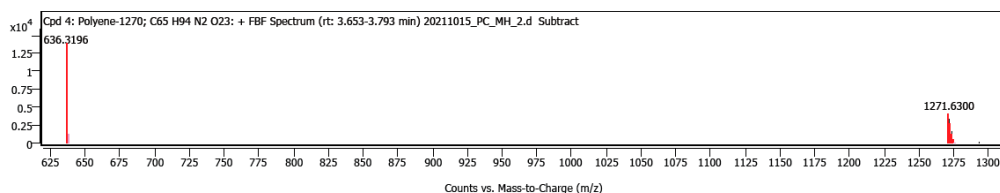

Fig. S5 Detection of mannosyl candicidin D,  $M = 1270.6247$ ,  $(M + 2H)^{2+}/2 = 636.3196$ ,  $(M + H)^+ = 1271.6300$ .

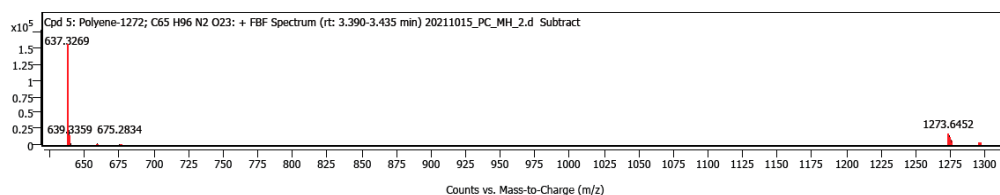

Fig. S6 Detection of mannosyl candicidin A3,  $M = 1272.6404$ ,  $(M + 2H)^{2+}/2 = 637.3269$ ,  $(M + H)^+ = 1273.6452$ .

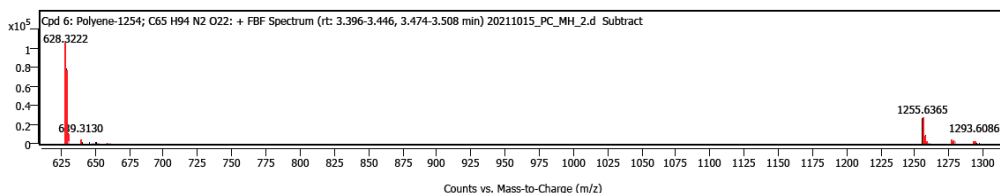

Fig. S7 Detection of mannosyl candicidin A1,  $M = 1254.6298$ ,  $(M + 2H)^{2+}/2 = 628.3222$ ,  $(M + H)^+ = 1255.6365$ ,  $(M + K)^+ = 1293.6086$

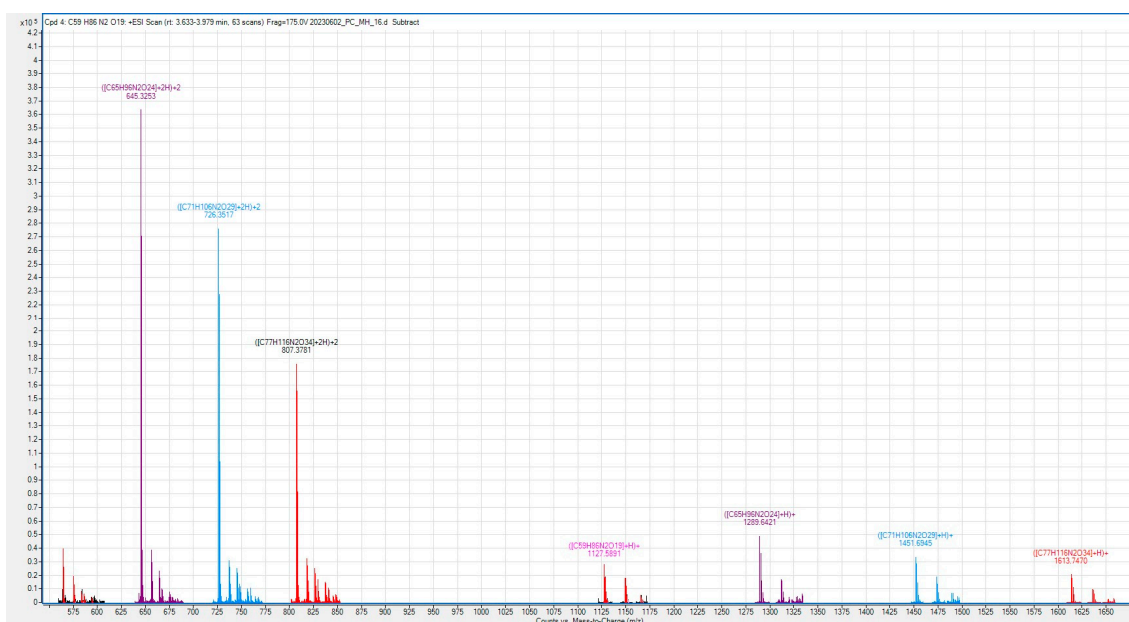

Fig. S8. Detection of tetrasaccharide-, trisaccharide-, disaccharide- and monosaccharide-containing aromatic heptaenes after modification of the 67-121C/67-121A complex with lactose. Molecular ions were identified as follows: lactose-modified 67-121C (tetrasaccharide),  $[M + H]^+ = 1613.7470$ ,  $[M + 2H]^{2+}/2 = 807.3781$ ; lactose-modified 67-121A (trisaccharide),  $[M + H]^+ = 1451.6945$ ,  $[M + 2H]^{2+}/2 = 726.3517$ ; unmodified 67-121C (disaccharide),  $[M + H]^+ = 1289.6421$ ,  $[M + 2H]^{2+}/2 = 645.3253$ ; unmodified 67-121A (monosaccharide),  $[M + H]^+ = 1127.5891$ .

|       |                                                                                                                                |     |
|-------|--------------------------------------------------------------------------------------------------------------------------------|-----|
| PenSV | MRILFSVSSWTGHYYAMFPLGWALRAAGHEVRVLCRPGDRDDVVVRAGLVPVPLDGPMDL                                                                   | 60  |
| SeISV | MRVLFPAISSWTGHYFPMVPLAWAMRAAGHDVRVLCRPSDQADVTAAGLIPVPALDGLDLL<br>*:*: :*****: *.**.*:*****:*****.*: **. ***:***.*** *:*        | 60  |
| PenSV | TGARLLNLVSSFSGTWPYPPTPPHPDSEGPVDD-AFDLQSLWLAGYWARATESSRAGTDAA                                                                  | 119 |
| SeISV | RGARLLNVMSLLQGTWPYPPEPPHPDTEAMDPAGDFIAAWHAENMPAMVASSRAGTDAA<br>*****:* :.***** *****:* :* .**.: :* * . *****                   | 120 |
| PenSV | VRYARDWQPDLVVHDQLSLDGLPLVA AVLGV PQVMHLWGVPVGPADSFPGVGEEAGRPADP                                                                | 179 |
| SeISV | VAFGRSWAPDLVVHDQLSLEGLPLVAVTGAPSVLHLWGVPAGTADAFAPVGGEQAGLPQDL<br>* :.*,* *****:****:* *.**.:*****.* **:*.*****:** * *          | 180 |
| PenSV | SDAFGRHGAGEFDHGRADLILDCPCGPLAAGLGKRVLPPIRYVPYNGPGDDPGPGALPAPT                                                                  | 239 |
| SeISV | SDAFTRYGAGTSLSHDLADHVLDPCPPPLRTAVAGRDAGIRYVPYNGPGAAPL--DLPEPD<br>*** *:*:*. ** :***** ** :.:. * ***** * ** *                   | 238 |
| PenSV | GR-RRVCVVWGRSATRTFGPVANKLPEVVRAATDHGADVLLLARPDAAAAGELPENVT                                                                     | 298 |
| SeISV | GRPRVCVIWGRSVTRTFGPVNRPLQAVRAAADLGAEVLLLARPEADARAGLPDPGVRP<br>** *****:*****.*:*.**:*****.* **:*****:.* ** *:.* *              | 298 |
| PenSV | MCEVPSMLVLDCGDAVVHYGGAGSAMTALVAGLPQLSVPIGLDQDLVAARLAATGAAC                                                                     | 358 |
| SeISV | FHEVPLSLVLPGCEAVVHYAGAGSVM TALTAGVPQLSVPCGFDQPMVAERLSATGAGLHV<br>: **:*** ** :*****.*****.***.***.***:***** *.** :** **:***. * | 358 |
| PenSV | PGPIADVESIGNALAAVLLEGFQHAEEAEKLAAAVAMP PPAVVADLESIVASRARAA                                                                     | 416 |
| SeISV | HNLDADAATLGGALEKLIQPSYADAARDLARRCAAMPSAEVVADLEALAA-----<br>* . . * . . * . * . * . * . * . * . * . * . *                       | 411 |

### SelSV synthetic gene sequence

>PenSV  
 CATATGCGCATCTGTCTCCGTGTCTCGTGGACCGGCCACTACTACGCGATGTTCCCG  
 CTGGGCTGGGCGCTGCGCGCCGCCGGCCACGAGGTCCGCGTGTCTGCGCCCCGCGAC  
 CGCGACGACGTCTGTCGGGGCCGGCTGGTCCCGTGCCCGTGTCTGGACGGGCGGACATG  
 CTGACCGGGGCCCCGCTGCTGAACGTGCTCAGCTCGTTCTCCGGCACATGGCCCTACCCG  
 ACCCGCGCGCCGACCCCGACAGCGGCGAGCCCGTCGACGACGCGTTTCGACCTCAGTCC  
 TGGCTGGCCGGCTACTGGGCGCGGGGACCGAGTCCTCGCGCGCCGGCACCGACGCGGCG  
 GTGCGGTACGCGCGGGACTGGCAGCCGGACCTCGTGGTGACGACAGCTCAGCCTCGAC  
 GGCCCGCTCGTCGCGCGGTTCTCGGGGTCCCGCAGGTGATGCACCTGTGGGGTCCGGTC  
 GGCCCGCGGACTCGTTCGGTCCCGTCGGCGGCGAGGAGCGGCCGTCCCGCCGACCCG  
 AGCGACGCGGTCGGCCGCCACGGCGCGCGAGTTCGACCACGGTCGCGCCGACCTGATC  
 CTCGACCCGTGCCCCGGCCCGCTGGCCCGGGGCTCGGCAAGCGCTCTGCCGATCCGC  
 TACGTGCCCTACAACGGGCCGGGCGACGACCCGGGCCCCGGCGCGCTGCCCGCACCGACC  
 GGGCGCAGGCGGGTCTGCGTCTGTTGGGCGCTCCGCGACGCGGACGTTCCGTCCGGTG  
 GCGAACAAAGCTGCCCCGAGGTGGTGCGGGCGGCCACCGACCACGGCGCCGACGTGCTGCTG  
 CTGGCCCCCGCGACGACGCAGCGCGCGCAGGCGAGCTGCCGGAACGTGACCGCGATG  
 TGCAGGTGCGCGATGAGTCTCGTGTCTCGACGGGTGCGACGCCGTCTGTGCACTACGGCGGT  
 GCCGGTCCGGCGATGACGGCGCTCGTGGCCGGCCTGCCGAGCTGTCCGTGCCGATCGGG  
 CTCGACCAAGATCTGGTGGCCGCGCACTCGCCGCCACCGGCGCCGCTGTACCGTGCCG  
 GGCCCGATCGCCGACGTGGAGTTCGATCGGCAACGCGCTGGCCGCCGTGCTGGAGGGGCCG  
 CAGCACGCGGAGGCCGCCGAGAAGCTCGCCGCCCGCTCGCCGCGATGCCGCCGCCGCG  
 GCCGTCTGCGCGATCTGGAGTCTGTCGTGGCCAGTTCGCGCCCGCGCTGCCTGAGCTT

Fig. S11. Synthetic PenSV coding sequence ordered from BaseClear. The GTG start codon was changed to ATG and three upstream nucleotides were added to create an NdeI restriction site (5' CATATG 3'). Nucleotides were added after the stop codon to create a HindIII site (5' AAGCTT 3'). Silent changes were made to eliminate internal PstI and NotI sites and to change the GGA glycine codon to GGT. This sequence was cloned between the NdeI and HindIII sites of the pET28a(+) expression plasmid.

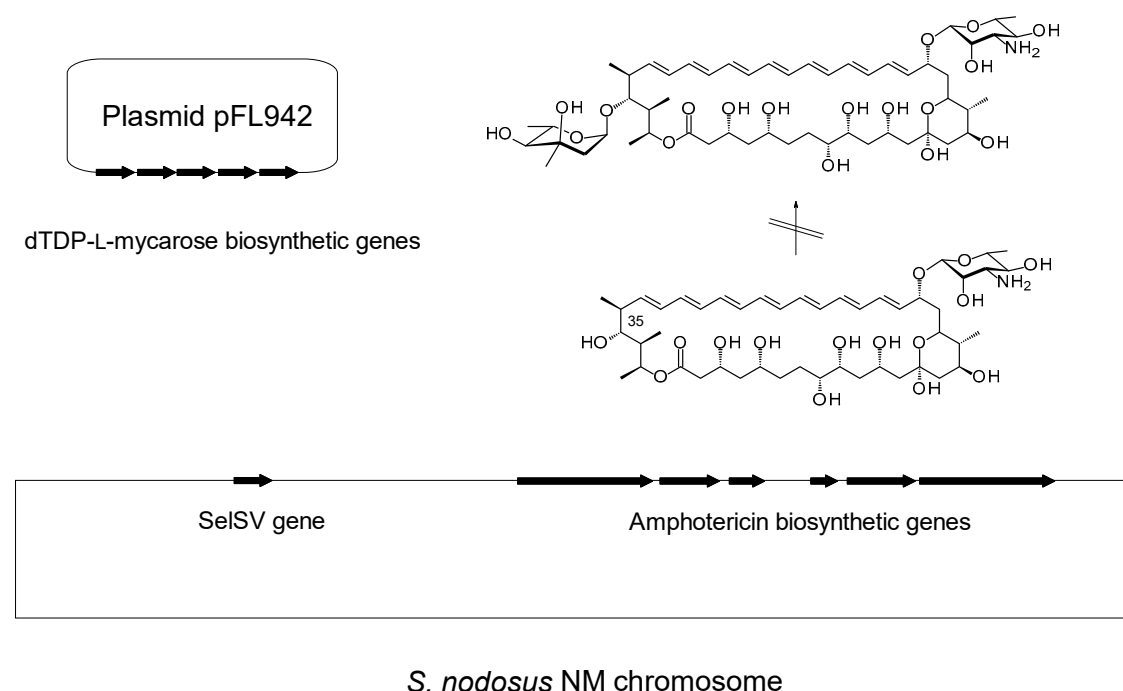

Fig. S12 Strategy for engineering biosynthesis of a mycarosylated or digitoxosylated amphotericin analogue. The *S. nodosus*  $\Delta amphNM$  strain produces 16-methyl-amphotericin B and 8-deoxy-16-methyl-amphotericin A. This strain was transformed with a pIJ10257-based integrating plasmid containing a synthetic *selSV* gene. The resulting strain was then transformed with the Salas pFL942 plasmid that gives biosynthesis of dTDP- $\beta$ -L-mycarose and dTDP- $\beta$ -L-digitoxose. However, no mycarosylated or digitoxosylated analogues were detected by HPLC or mass spectrometry.

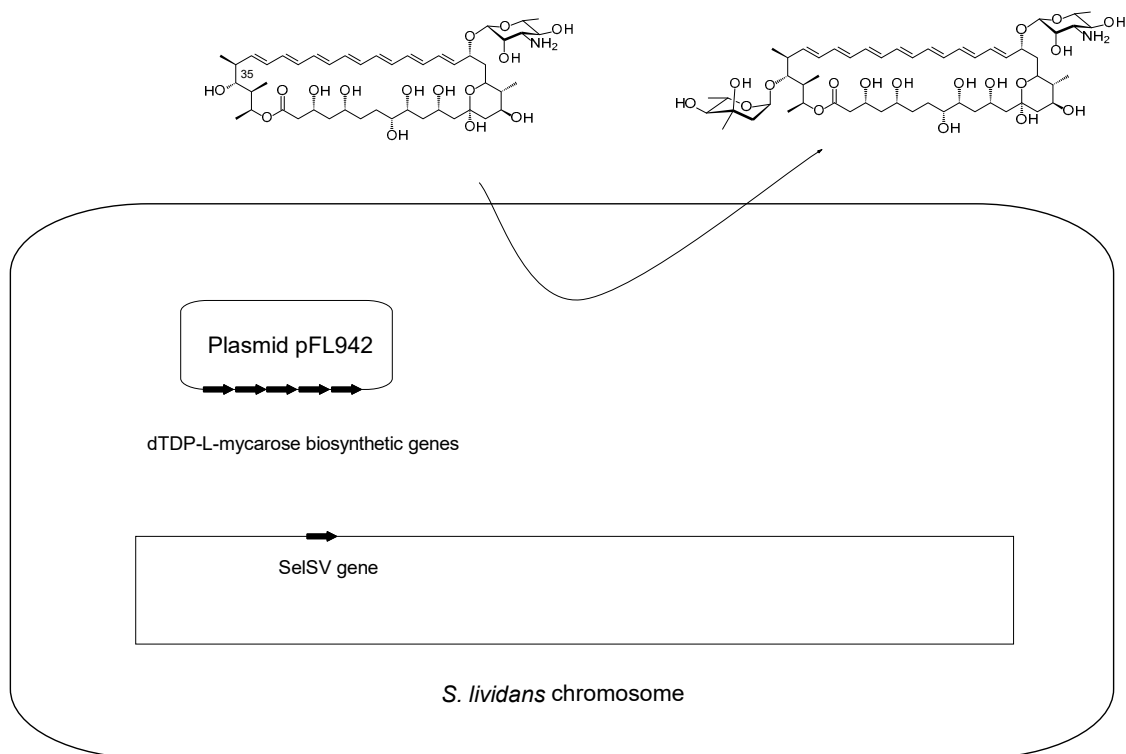

Fig. S13 Schematic diagram illustrating strategy for aglycone feeding.

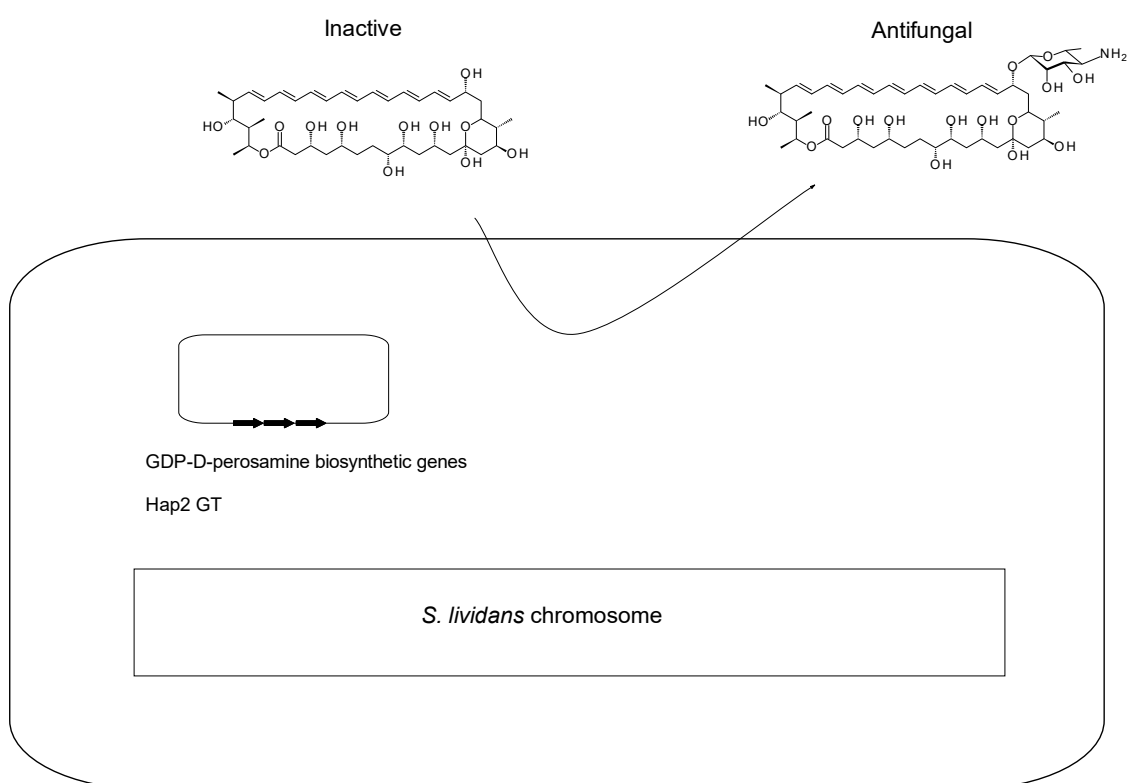

Fig. S14 Schematic diagram illustrating strategy for biotransformation of inactive amphoteronolides to active perosaminyl-amphoteronolides.

Table S1. *S. nodosus* transformants undergoing testing for production of new glycoanalogues.

| Strain                                               | Expected products                                                                           |
|------------------------------------------------------|---------------------------------------------------------------------------------------------|
| <i>S. nodosus</i> pIJ- <i>penSV</i> pIAGO            | Amphotericins A and B                                                                       |
| <i>S. nodosus</i> pIJ- <i>penSV</i> pFL942           | Mycarosylated/digitoxosylated amphotericins A and B                                         |
| <i>S. nodosus</i> NM pIJ- <i>penSV</i> pIAGO         | 16-Methyl-amphotericin B, 8-Deoxy-16-methyl amphotericin A                                  |
| <i>S. nodosus</i> NM pIJ- <i>penSV</i> pFL942        | Mycarosylated/digitoxosylated 16-methyl-amphotericin B and 8-deoxy-16-methyl amphotericin A |
| <i>S. nodosus</i> DI-DII-NM pIJ- <i>penSV</i> pIAGO  | 8-Deoxy-16-methyl-amphoteronolides A and B                                                  |
| <i>S. nodosus</i> DI-DII-NM pIJ- <i>penSV</i> pFL942 | Mycarosylated/digitoxosylated 8-deoxy-16-methyl-amphoteronolides A and B                    |
|                                                      |                                                                                             |

Table S2. Molecular masses of hypothetical 35-*O*-glycosylated amphotericins.

| Polyene | Name                                            | Exact mass | Molecular formula                                |
|---------|-------------------------------------------------|------------|--------------------------------------------------|
|         |                                                 |            |                                                  |
| 1       | Amphotericin B                                  | 923.4879   | C <sub>47</sub> H <sub>73</sub> NO <sub>17</sub> |
| 2       | Mycarosyl-amphotericin B                        | 1067.5665  | C <sub>54</sub> H <sub>85</sub> NO <sub>20</sub> |
| 3       | Digitoxosyl-amphotericin B                      | 1053.5508  | C <sub>53</sub> H <sub>83</sub> NO <sub>20</sub> |
| 4       | Amphotericin A                                  | 925.5035   | C <sub>47</sub> H <sub>75</sub> NO <sub>17</sub> |
| 5       | Mycarosyl-amphotericin A                        | 1069.5821  | C <sub>54</sub> H <sub>87</sub> NO <sub>20</sub> |
| 6       | Digitoxosyl-amphotericin A                      | 1055.5665  | C <sub>54</sub> H <sub>87</sub> NO <sub>20</sub> |
| 7       | 16-Methyl-amphotericin B                        | 893.5137   | C <sub>47</sub> H <sub>75</sub> NO <sub>15</sub> |
| 8       | Mycarosyl-16-methyl-amphotericin B              | 1037.5923  | C <sub>54</sub> H <sub>87</sub> NO <sub>18</sub> |
| 9       | Digitoxosyl-16-methyl-amphotericin B            | 1023.5767  | C <sub>53</sub> H <sub>85</sub> NO <sub>18</sub> |
| 10      | 8-Deoxy-16-methyl-amphotericin A                | 879.5344   | C <sub>47</sub> H <sub>77</sub> NO <sub>14</sub> |
| 11      | Mycarosyl-8-Deoxy-16-methyl-amphotericin A      | 1023.6131  | C <sub>54</sub> H <sub>89</sub> NO <sub>17</sub> |
| 12      | Digitoxosyl-8-Deoxy-16-methyl-amphotericin A    | 1009.5974  | C <sub>53</sub> H <sub>87</sub> NO <sub>17</sub> |
| 13      | 8-Deoxy-16-methyl-amphoteronolide B             | 732.4449   | C <sub>41</sub> H <sub>64</sub> O <sub>11</sub>  |
| 14      | Mycarosyl-8-deoxy-16-methyl-amphoteronolide B   | 876.5235   | C <sub>48</sub> H <sub>76</sub> O <sub>14</sub>  |
| 15      | Digitoxosyl-8-deoxy-16-methyl-amphoteronolide B | 862.5079   | C <sub>47</sub> H <sub>74</sub> O <sub>14</sub>  |
| 16      | 8-Deoxy-16-methyl-amphoteronolide A             | 734.4605   | C <sub>41</sub> H <sub>66</sub> O <sub>11</sub>  |
| 17      | Mycarosyl-8-deoxy-16-methyl-amphoteronolide A   | 878.5392   | C <sub>48</sub> H <sub>78</sub> O <sub>14</sub>  |
| 18      | Digitoxosyl-8-deoxy-16-methyl-amphoteronolide A | 864.5235   | C <sub>47</sub> H <sub>76</sub> O <sub>14</sub>  |

Table S3. Microbial strains

| Micro-organism                              | Properties                                                                                                                 |
|---------------------------------------------|----------------------------------------------------------------------------------------------------------------------------|
|                                             |                                                                                                                            |
| <i>Escherichia coli</i> DH5 $\alpha$        | General cloning host                                                                                                       |
| <i>Cryptosporangium arvum</i> DSM44712      | Predicted to synthesise disaccharide-containing octaene                                                                    |
|                                             |                                                                                                                            |
| <i>S. nodosus</i>                           | Synthesises amphotericins B and A                                                                                          |
| <i>S. nodosus</i> $\Delta$ amphNM           | Synthesises 16-descarboxyl-16-methyl-amphotericin B and 8-deoxy-16-descarboxyl-16-methyl-amphotericin A                    |
| <i>S. nodosus</i> $\Delta$ amphDI-NM        | Synthesises aglycones 8-deoxy-16-descarboxyl-16-methyl-amphoteronolides B and A, proficient in GDP-mycosamine biosynthesis |
| <i>S. nodosus</i> $\Delta$ amphDI-DII-NM    | Synthesises aglycones 8-deoxy-16-descarboxyl-16-methyl-amphoteronolides B and A, deficient in GDP-mycosamine biosynthesis  |
| <i>S. nodosus</i> $\Delta$ amphDIII         | Synthesises aglycones 8-deoxy-amphoteronolides B and A                                                                     |
| <i>S. nodosus</i> M57                       | Synthesises pentaene analogue of amphotericin B                                                                            |
|                                             |                                                                                                                            |
| <i>Streptomyces albidoflavus</i> DSM40624   | Synthesises candicidins                                                                                                    |
|                                             |                                                                                                                            |
| <i>Couchioplanes caeruleus</i> DSM43634     | Synthesises monosaccharide-containing 67-121A and disaccharide-containing 67-121C                                          |
| <i>Pseudonocardia endophytica</i> DSM44969  | Predicted to synthesise nystatin A3, which contains two unlinked monosaccharide sugar residues                             |
| <i>Streptomyces cacaoi</i> DSM40057         | Synthesises perimycin                                                                                                      |
| <i>Streptomyces lividans</i>                | Host for biotransformation strain                                                                                          |
| <i>Streptomyces eurocidicus</i> DSM40604    | Synthesises eurocidins                                                                                                     |
| <i>Saccharopolyspora gloriosae</i> DSM45582 | Predicted to synthesise selvamicin-related pentaene containing two unlinked monosaccharide sugar residues                  |
|                                             |                                                                                                                            |
| <i>Candida albicans</i>                     | Indicator organism for antifungal assays                                                                                   |



Table S4. Oligonucleotides

| Oligonucleotide | Sequence                                   |
|-----------------|--------------------------------------------|
|                 |                                            |
| NGTF3           | 5' AGCTAGATCTTGCAGGGCACCGGCAAACGCCCCG 3'   |
| NGTR1           | 5' GATCAAGCTTAAGGCACGTCAGCCGGACGGAAG 3'    |
|                 |                                            |
| PerD3F          | 5' GATCAAGCTTGAGGAGACGGGATGTCCAAGCGCGCG 3' |
| PerD3R          | 5' GATCAAGCTTCCCTAGTGATGCCGCGGGCTAC 3'     |
|                 |                                            |
| CrypF           | 5' ACTGGGATCCGGCGACATCGGAGGGCTGGCGGCATG 3' |
| CrypR           | 5' GATCAAGCTTCATCGGTTGCTCCGGTCATCAG 3'     |
|                 |                                            |
| SGDF1           | 5' ATGCAGATCTCGCGAAGGGCGTGTTTCATG 3'       |
| SGDR            | 5' GTCAAAGCTTCGAAACGGGGTAGCGCATCAG 3'      |
| EurDI-F         | 5' GTACGGATCCACTGAAAGGGAATCCATGGACTC 3'    |
| EurM-R          | 5' GATCAAGCTTCTCAGGTGCTTTCATCGATG 3'       |
|                 |                                            |
